# Supplementary material for: The Total Dietary Antioxidant Capacity, Its Seasonal Variability, and Dietary Sources in Cardiovascular Patients
Source: MDPI journal article supplement (doi:10.3390/antiox12020292), 2023-01-28
Supplement: s1 [file s1]

Table S1. The total dietary antioxidant capacity and nutritional value of daily diet in the study group. On average. in four seasons. Values adjusted per 1000 kcal<sup>1</sup>

| Variables                                                      | Men + women (n=143)        |                 |                    |                    | Men (n=82)                 |        |       |        | Women (n=61)               |        |       |        | P <sup>7</sup> |
|----------------------------------------------------------------|----------------------------|-----------------|--------------------|--------------------|----------------------------|--------|-------|--------|----------------------------|--------|-------|--------|----------------|
|                                                                | X <sup>8</sup> (95%CI)     | Me <sup>9</sup> | Min. <sup>10</sup> | Max. <sup>11</sup> | X (95%CI)                  | Me     | Min.  | Max.   | X (95%CI)                  | Me     | Min.  | Max.   |                |
| T-ORAC <sup>7</sup><br>( $\mu$ molTE/day) <sup>2</sup>         | 25 628<br>(23 254; 28 003) | 23 983          | 5 064              | 90 931             | 25 174<br>(22 298; 28 050) | 24 650 | 5 064 | 89 986 | 26 238<br>(22 138; 30 339) | 23 758 | 6 956 | 90 931 | NS             |
| Q-ORAC <sub>1000</sub> <sup>3</sup><br>( $\mu$ molTE/1000kcal) | 14 386<br>(13 305; 15 467) | 13 075          | 3 566              | 52 097             | 12 797<br>(11 784; 13 811) | 12 323 | 3 971 | 25 702 | 16 521<br>(14 465; 18 576) | 15 202 | 3 566 | 52 097 | **             |
| Energy (kJ)                                                    | 4187                       | 4187            | -                  | -                  | 4187                       | 4187   | -     | -      | 4187                       | 4187   | -     | -      | -              |
| Energia (kcal)                                                 | 1000                       | 1000            | -                  | -                  | 1000                       | 1000   | -     | -      | 1000                       | 1000   | -     | -      | -              |
| Total proteins (g/1000kcal)                                    | 40.3<br>(38.9; 41.6)       | 40.0            | 21.2               | 65.3               | 39.0<br>(37.2; 40.9)       | 38.2   | 21.2  | 63.3   | 41.9<br>(40.0; 43.8)       | 40.6   | 26.2  | 65.3   | *              |
| Plant proteins (g/1000kcal)                                    | 14.3<br>(13.8; 14.8)       | 14.4            | 7.6                | 26.5               | 13.7<br>(13.2; 14.3)       | 14.0   | 7.7   | 18.9   | 15.1<br>(14.2; 16.0)       | 15.1   | 7.6   | 26.5   | **             |
| Total fat (g/1000kcal)                                         | 44.2<br>(42.6; 45.7)       | 43.1            | 20.4               | 74.1               | 45.5<br>(43.6; 47.5)       | 45.2   | 27.1  | 68.2   | 42.4<br>(39.8; 44.9)       | 40.5   | 20.4  | 74.1   | *              |
| Total Carbohydrates<br>(g/1000kcal)                            | 123.3<br>(119.7; 126.8)    | 125.2           | 59.9               | 177.9              | 120.0<br>(115.7; 124.2)    | 122.2  | 72.6  | 160.5  | 127.7<br>(121.6; 133.8)    | 132.5  | 59.9  | 177.9  | *              |
| Sodium (mg/1000kcal)                                           | 1 045<br>(1 009; 1 080)    | 1 050           | 502                | 1 690              | 1 080<br>(1 032; 1 128)    | 1 064  | 614   | 1 690  | 998<br>(946; 1 050)        | 1 010  | 502   | 1 447  | *              |
| Potassium (mg/1000kcal)                                        | 1 871<br>(1 785; 1 958)    | 1 798           | 932                | 4 337              | 1 764<br>(1 680; 1 847)    | 1 719  | 983   | 2 998  | 2 016<br>(1 851; 2 180)    | 1 942  | 932   | 4 337  | **             |
| Calcium (mg/1000kcal)                                          | 817<br>(779; 854)          | 801             | 391                | 1 734              | 761<br>(723; 799)          | 771    | 391   | 1 246  | 892<br>(823; 960)          | 885    | 415   | 1 734  | ***            |
| Phosphorus (mg/1000kcal)                                       | 695<br>(671; 720)          | 699             | 394                | 1 038              | 664<br>(631; 696)          | 631    | 397   | 932    | 738<br>(702; 774)          | 727    | 394   | 1 038  | **             |
| Magnesium (mg/1000kcal)                                        | 167<br>(159; 174)          | 164             | 92                 | 300                | 159<br>(150; 168)          | 155    | 92    | 299    | 177<br>(165; 189)          | 178    | 92    | 300    | **             |
| Iron (mg/1000kcal)                                             | 6.1<br>(5.9; 6.4)          | 6.0             | 3.6                | 11.9               | 5.9<br>(5.6; 6.1)          | 5.6    | 3.8   | 10.2   | 6.5<br>(6.1; 6.8)          | 6.2    | 3.6   | 11.9   | **             |
| Zinc (mg/1000kcal)                                             | 6<br>(5; 6)                | 6               | 3                  | 8                  | 5.6<br>(5.3; 5.8)          | 5.5    | 3.6   | 8.3    | 6<br>(6; 6)                | 6      | 3     | 8      | NS             |
| Manganese (mg/1000kcal)                                        | 3.1                        | 2.8             | 1.1                | 7.1                | 2.9                        | 2.5    | 1.1   | 7.1    | 3.4                        | 3.0    | 1.3   | 6.2    | *              |

|                                |                         |       |     |        |                         |       |     |       |                         |       |     |        |     |
|--------------------------------|-------------------------|-------|-----|--------|-------------------------|-------|-----|-------|-------------------------|-------|-----|--------|-----|
|                                | (2.9; 3.4)              |       |     |        | (2.7; 3.2)              |       |     |       | (3.1; 3.7)              |       |     |        |     |
| Vitamin A (µg/1000kcal)        | 571<br>(516; 626)       | 487   | 142 | 3 084  | 477<br>(431; 522)       | 415   | 142 | 1 365 | 698<br>(590; 806)       | 603   | 301 | 3 084  | *** |
| Beta-carotene (µg/1000kcal)    | 2 534<br>(2 136; 2 931) | 1 759 | 340 | 21 683 | 1 854<br>(1 540; 2 169) | 1 389 | 340 | 8 280 | 3 446<br>(2 659; 4 234) | 2 695 | 712 | 21 683 | *** |
| Vitamin D<br>(µg/1000kcal)     | 1.3<br>(1.1; 1.4)       | 1.1   | 0.2 | 7.3    | 1.3<br>(1.1; 1.5)       | 1.1   | 0.3 | 5.3   | 1.3<br>(1.0; 1.6)       | 1.0   | 0.2 | 7.3    | NS  |
| Vitamin E<br>(mg/1000kcal)     | 5.6<br>(5.3; 5.9)       | 5.4   | 2.4 | 14.0   | 5.3<br>(5.0; 5.6)       | 5.3   | 2.5 | 11.0  | 6.0<br>(5.5; 6.6)       | 5.6   | 2.4 | 14.0   | **  |
| Thiamine<br>(mg/1000kcal)      | 0.6<br>(0.6; 0.7)       | 0.6   | 0.4 | 1.3    | 0.6<br>(0.6; 0.6)       | 0.6   | 0.4 | 0.9   | 0.7<br>(0.6; 0.7)       | 0.6   | 0.4 | 1.3    | *   |
| Riboflavin<br>(mg/1000kcal)    | 0.9<br>(0.8; 0.9)       | 0.8   | 0.4 | 1.4    | 0.8<br>(0.8; 0.8)       | 0.8   | 0.5 | 1.2   | 0.9<br>(0.9; 1.0)       | 0.9   | 0.4 | 1.4    | *** |
| Niacin<br>(mg/1000kcal)        | 9.2<br>(8.7; 9.7)       | 8.8   | 4.3 | 21.3   | 8.8<br>(8.2; 9.4)       | 8.6   | 4.3 | 17.0  | 9.6<br>(8.8; 10.5)      | 9.6   | 5.0 | 21.3   | NS  |
| Vitamin B6<br>(mg/1000kcal)    | 1.1<br>(1.0; 1.1)       | 1.0   | 0.6 | 2.4    | 1.0<br>(0.9; 1.0)       | 1.0   | 0.6 | 1.5   | 1.2<br>(1.1; 1.3)       | 1.2   | 0.6 | 2.4    | *** |
| Folate<br>(µg/1000kcal)        | 130<br>(122; 138)       | 124   | 66  | 449    | 115<br>(108; 121)       | 108   | 66  | 202   | 151<br>(137; 166)       | 141   | 81  | 449    | *** |
| Cobalamin<br>(µg/1000kcal)     | 1.8<br>(1.7; 2.0)       | 1.6   | 0.2 | 10.4   | 1.8<br>(1.6; 2.0)       | 1.6   | 0.5 | 6.5   | 2.0<br>(1.6; 2.3)       | 1.6   | 0.2 | 10.4   | NS  |
| Vitamin C<br>(mg/1000kcal)     | 47<br>(43; 52)          | 41    | 14  | 224    | 40<br>(37; 44)          | 37    | 15  | 99    | 56<br>(47; 65)          | 46    | 14  | 224    | *** |
| SFA <sup>4</sup> (g/1000kcal)  | 15.7<br>(14.9; 16.5)    | 15.2  | 5.5 | 29.2   | 16.3<br>(15.2; 17.4)    | 15.9  | 8.1 | 29.2  | 14.9<br>(13.7; 16.1)    | 14.9  | 5.5 | 26.6   | NS  |
| MUFA <sup>5</sup> (g/1000kcal) | 18.2<br>(17.4; 19.0)    | 18.0  | 5.9 | 32.8   | 18.9<br>(17.9; 19.8)    | 19.1  | 8.8 | 28.6  | 17.2<br>(15.9; 18.6)    | 17.1  | 5.9 | 32.8   | *   |
| PUFA <sup>6</sup> (g/1000kcal) | 7.5<br>(7.0; 7.9)       | 7.2   | 2.7 | 18.5   | 7.4<br>(6.9; 8.0)       | 7.4   | 2.7 | 16.8  | 7.5<br>(6.7; 8.2)       | 7.0   | 3.0 | 18.5   | NS  |
| Cholesterol (mg/1000kcal)      | 148<br>(139; 157)       | 139   | 30  | 345    | 150<br>(137; 164)       | 137   | 30  | 345   | 144<br>(132; 156)       | 139   | 38  | 321    | NS  |
| Sucrose<br>(g/1000kcal)        | 13<br>(12; 14)          | 13    | 3   | 37     | 13<br>(12; 14)          | 12    | 3   | 31    | 14<br>(13; 16)          | 13    | 4   | 37     | NS  |
| Fibre (g/1000kcal)             | 14                      | 12    | 5   | 36     | 12                      | 11    | 6   | 23    | 16                      | 14    | 5   | 36     | *** |

|  |          |  |  |  |          |  |  |  |          |  |  |  |  |
|--|----------|--|--|--|----------|--|--|--|----------|--|--|--|--|
|  | (13; 14) |  |  |  | (11; 13) |  |  |  | (14; 17) |  |  |  |  |
|--|----------|--|--|--|----------|--|--|--|----------|--|--|--|--|

<sup>1</sup>Data were analysed after their logarithmic transformation. <sup>2</sup>Total antioxidant capacity of the daily diet. <sup>3</sup>Antioxidative density of the daily diet. <sup>4</sup>Saturated fatty acids. <sup>5</sup>Monounsaturated fatty acids. <sup>6</sup>Polyunsaturated fatty acids. <sup>7</sup>Level of significance for comparing means between groups: \*p<0.05. \*\*p<0.01. \*\*\*p<0.001. NS – statistically insignificant differences. <sup>8</sup>Mean (95% confidence interval). <sup>9</sup>Median. <sup>10</sup>Minimum. <sup>11</sup>Maximum.
